# Supplementary material
Source: Springer Nature journal article supplement (https://www.springermedizin.de/resource/supplementary/13256_2011_1942_MOESM2_ESM.pdf/9648774)

PRL promoter activity  
(fold induction)

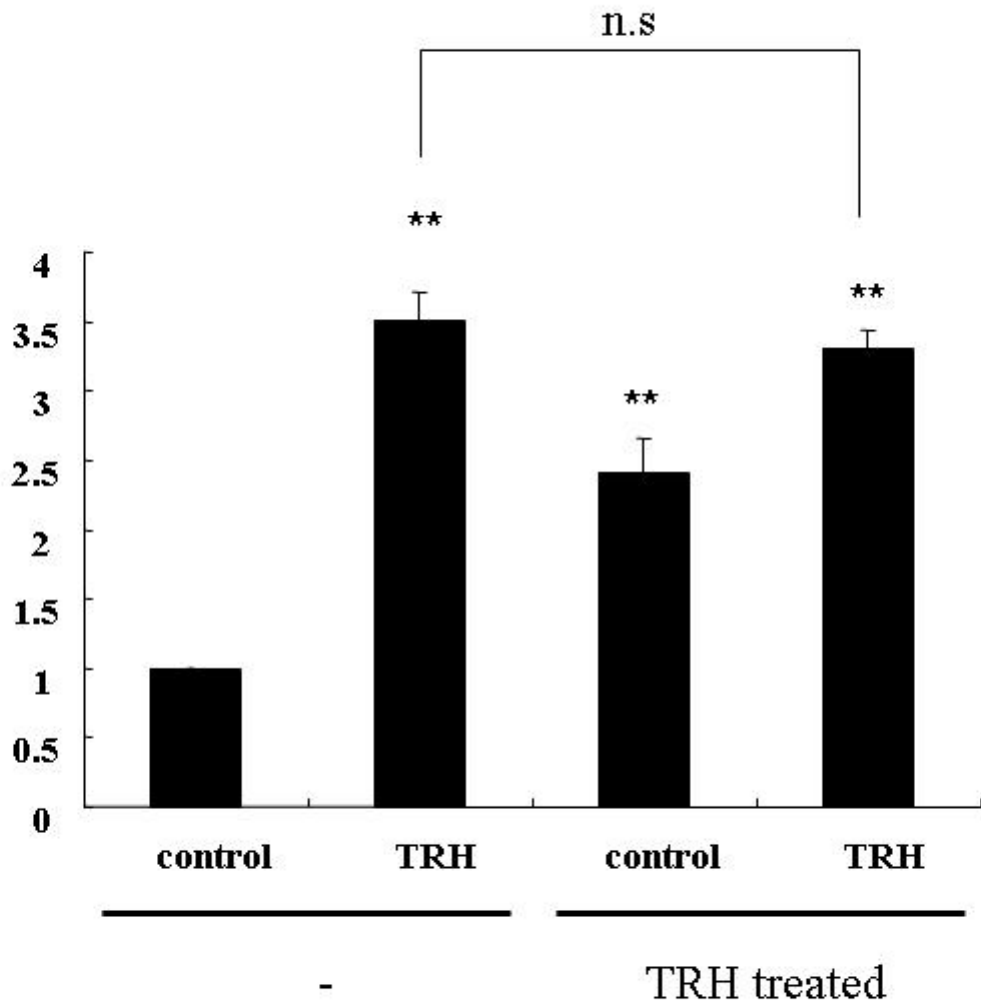

Supplement: MOESM2 [file 9648774]
